# Supplementary material for: Structure of the Plasmodium-interspersed repeat proteins of the malaria parasite
Source: PubMed Central journal article supplement (PMC7749308; doi:10.1073/pnas.2016775117), 2020-11-30
Supplement: pnas.2016775117.sapp.pdf [file pnas.2016775117.sapp.pdf]

## **Supplementary Information**

### **Structure of the *Plasmodium*-interspersed repeat proteins of the malaria parasite**

Thomas E. Harrison, Adam J. Reid, Deirdre Cunningham, Jean Langhorne and  
Matthew K. Higgins

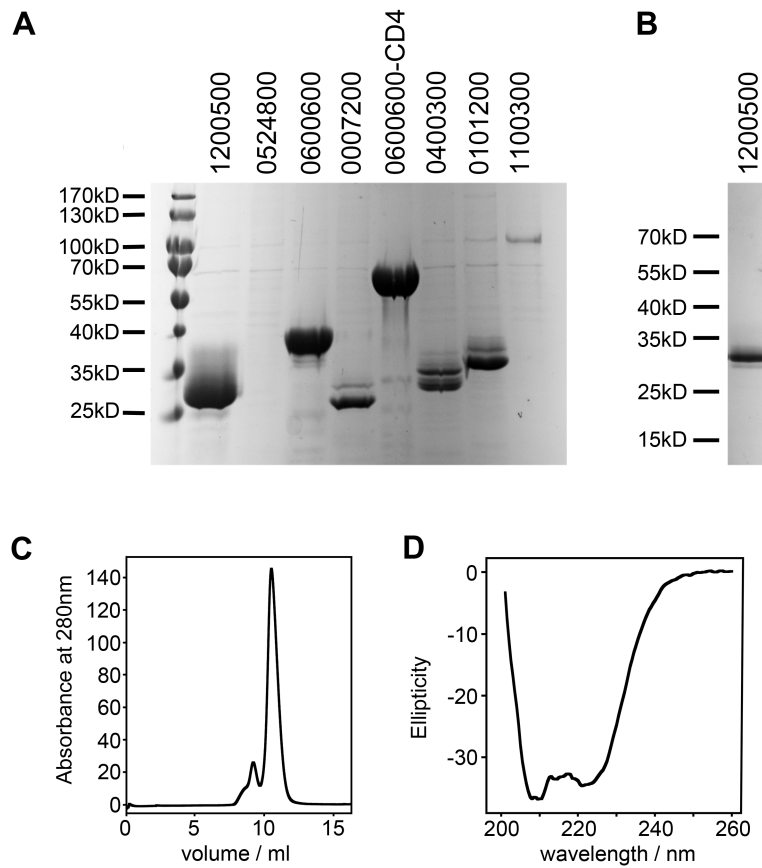

**Supplementary Figure 1: Biophysical analysis of protein quality**

**A.** Expression trial gel for CIR proteins expressed in HEK293 cells and purified using their His-tag before SDS-PAGE analysis. 06000600-CD4 also has a C-terminal CD4 tag. **B.** Coomassie-stained SDS PAGE gel; **C.** size exclusion column chromatogram (Superdex S75 10/30); and **D.** circular dichroism analysis of purified CIR 1200500.

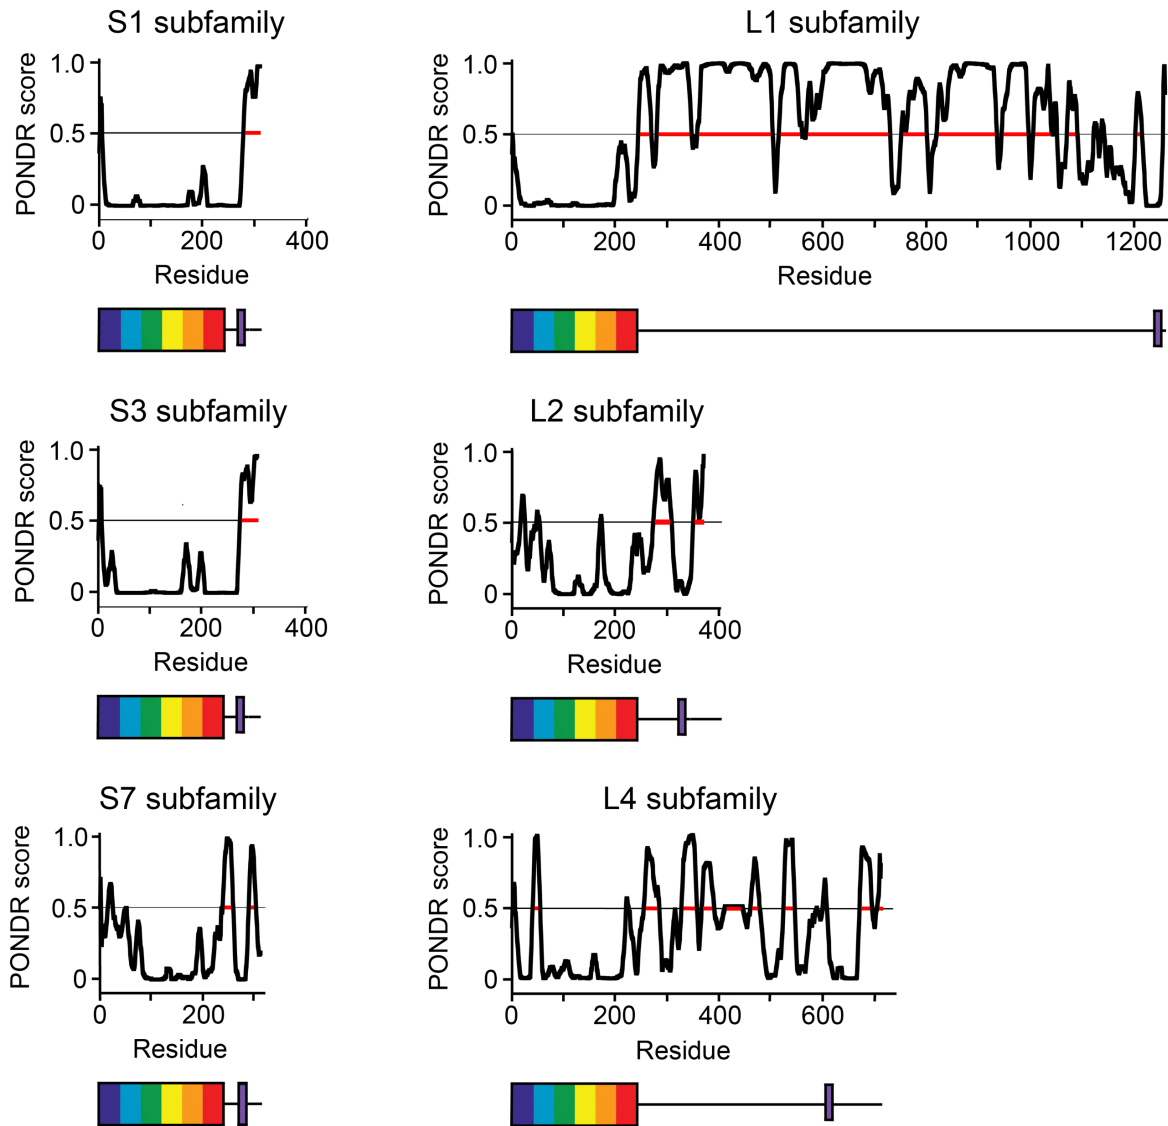

**Supplementary Figure 2: Disorder prediction for different subfamilies of CIR protein.**

Prediction of disorder for members of the six subfamilies of CIR proteins. In each case this is for the protein most close in sequence to the average sequence for that protein subfamily, as indicated by the sequence logo (for S1, PCHAS\_0700300; for S3, PCHAS\_1000300; for S7, PCHAS\_0500200; for L1, PCHAS\_0601000; for L2, PCHAS\_0318500; and for L4, PCHAS\_0301800). Prediction of disorder, determined using PONDOR, is plotted against residue number. Below the plots are representations of the two proteins, showing the PIR protein domain as a rainbow box and the transmembrane helix in purple.

Supplementary Figure 3 – page 1

A

| Family                                  | Compared with      | Confidence       |
|-----------------------------------------|--------------------|------------------|
| <i>P. chabaudi</i>                      | CIR                | 100 (100-100)    |
| <i>P. berghei</i>                       | CIR                | 99.9 (98.9-100)  |
| <i>P. yoelii</i>                        | CIR                | 100 (100-100)    |
| <i>P. knowlesi</i>                      | CIR                | 98.7 (98.2-98.9) |
| <i>P. malariae</i>                      | CIR                | 97.7 (88.9-99.0) |
| <i>P. ovale</i>                         | CIR                | 98.3 (94.1-99.6) |
| <i>P. vivax</i>                         | CIR                | 97.9 (91.6-99.8) |
| <i>P. falciparum</i> STEVOR             | CIR                | 83.0 (65.0-91.0) |
| <i>P. reichenowi</i>                    | CIR                | 66.4 (0.4-88.8)  |
| <i>P. gallinaceum</i>                   | CIR                | 42.5 (0-93.0)    |
| <i>P. falciparum</i> RIFIN <sub>C</sub> | CIR                | 1.1 (0.1-2.6)    |
| <i>P. falciparum</i> RIFIN <sub>C</sub> | CIR <sub>N</sub>   | 0.4 (0.3-0.5)    |
| <i>P. falciparum</i> RIFIN <sub>C</sub> | CIR <sub>C</sub>   | 0.3 (0.1-0.5)    |
| <i>P. falciparum</i> STEVOR             | RIFIN <sub>V</sub> | 24.7 (10.0-52.9) |
| <i>P. reichenowi</i>                    | RIFIN <sub>V</sub> | 71.5 (1.0-96.0)  |

B

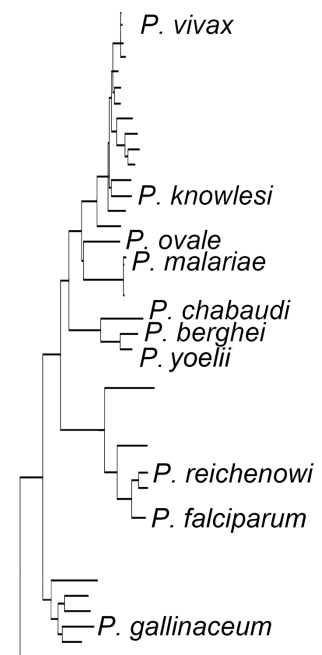



**C** *P. chabaudi*

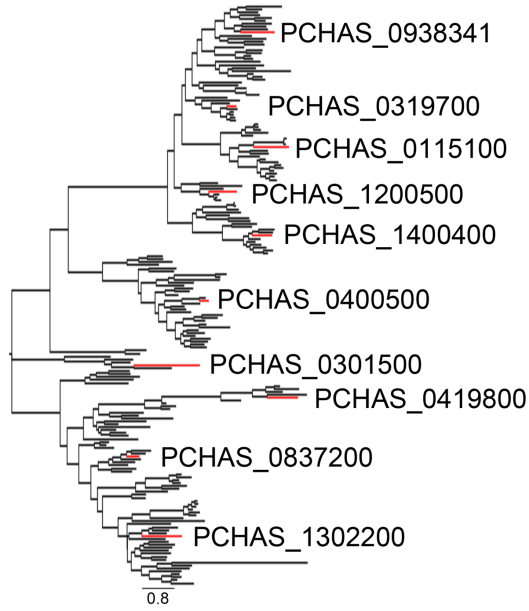

**D** *P. berghei*

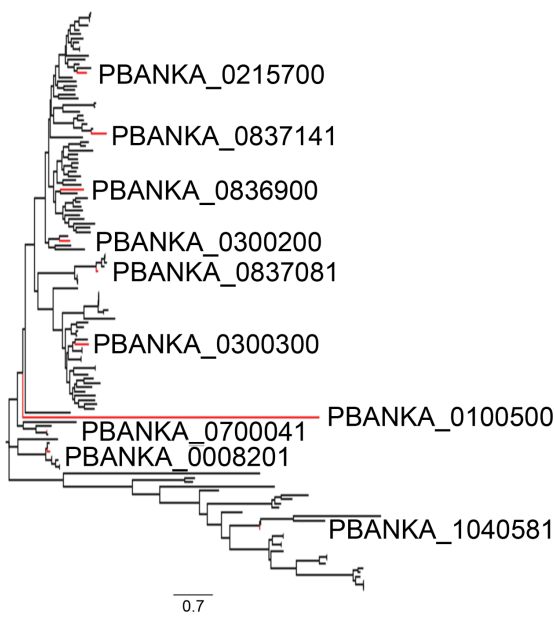

**E** *P. yoelii*

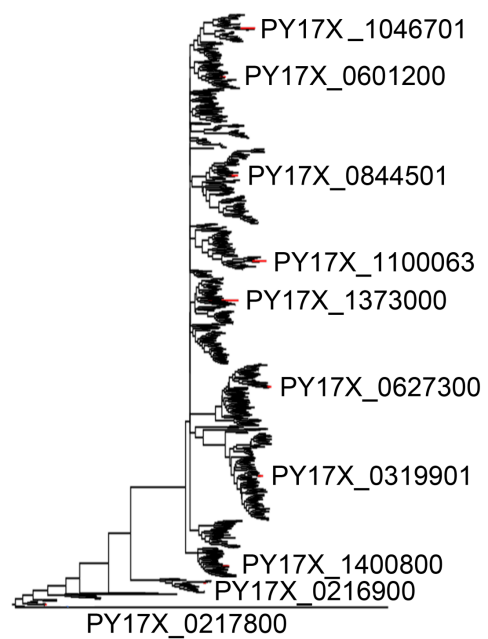

Supplementary Figure 3 – page 3

F *P. vivax*

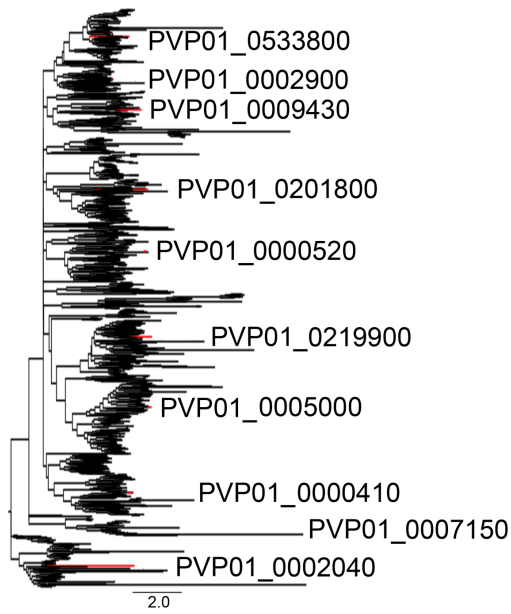

G *P. knowlesi*

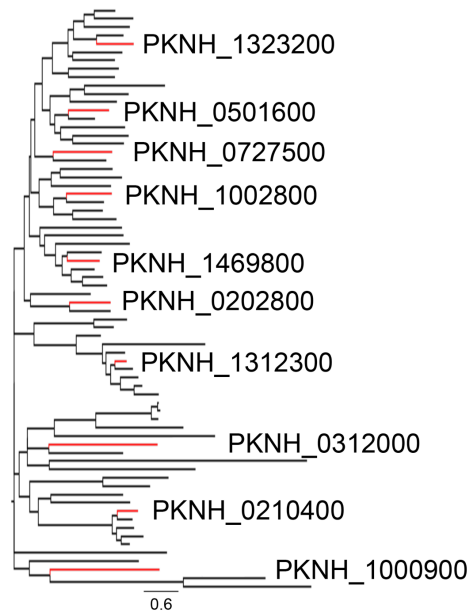

H *P. malariae*

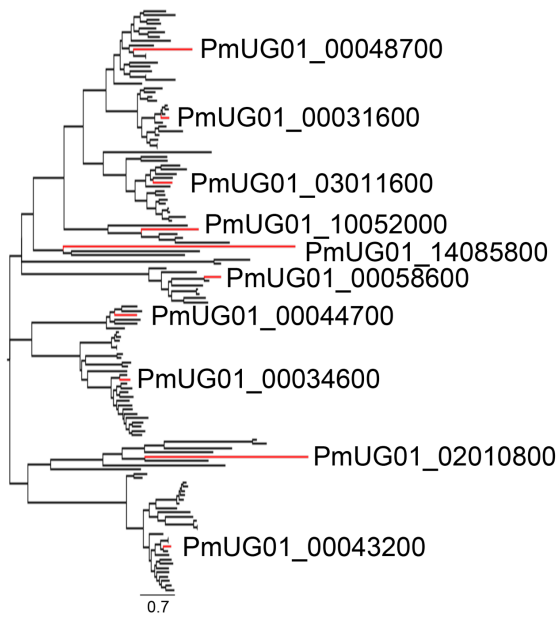

I *P. ovale*

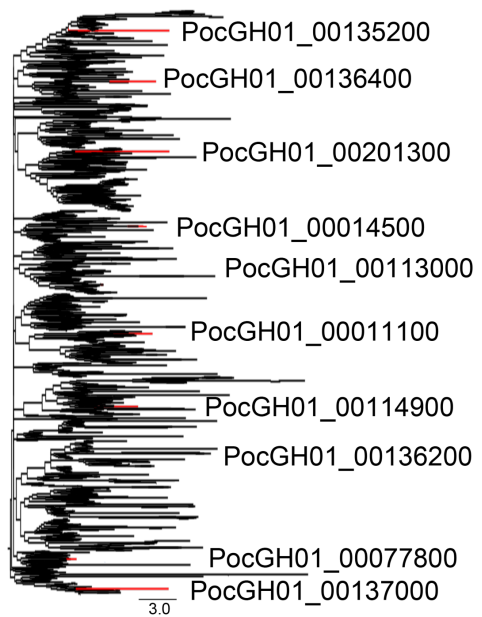

**Supplementary Figure 3 – page 4**

**J** *P. falciparum* RIFIN

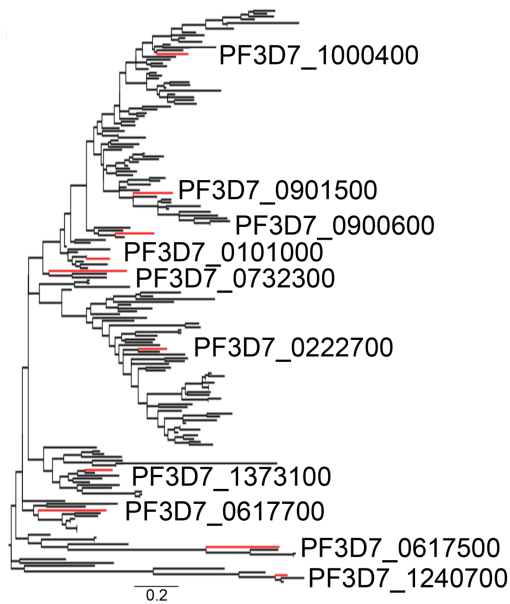

**K** *P. falciparum* STEVOR

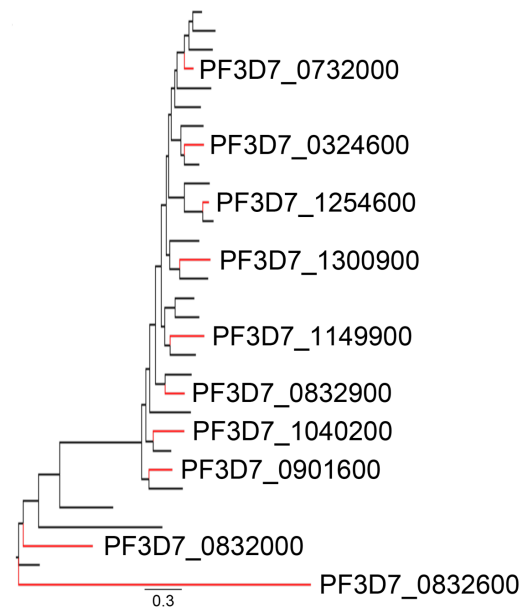

**L** *P. reichenowi*

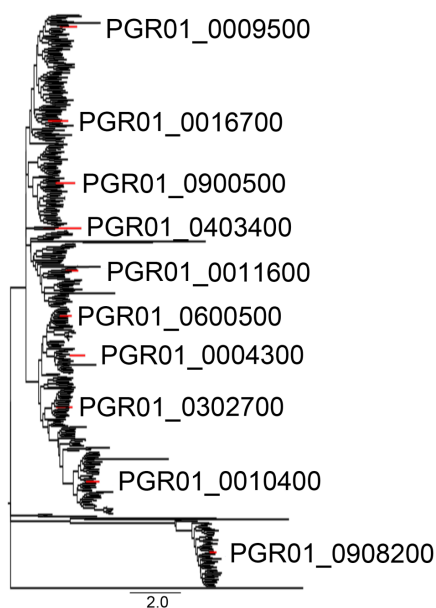

**M** *P. gallinaceum*

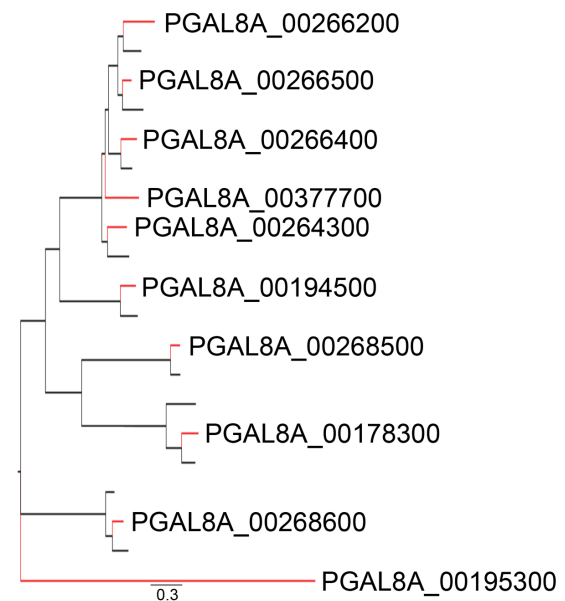

**Supplementary Figure 3: Selection of small VSA proteins for analysis**

**A.** The Phyre2 confidence scores for modelling of different small VSA proteins using the known structures of the CIR protein, its C-terminal domain (CIR<sub>C</sub>: residues 152 – 241), its N-terminal domain (CIR<sub>N</sub>: residues 4 - 151) or against the RIFIN variable domain (RIFIN<sub>V</sub>). **B.** evolutionary tree for *Plasmodium* species, based on (50). **C.-M.** Evolutionary trees, based on sequence analysis of small VSA protein families from different *Plasmodium* species. The ten members of each family used for modelling studies are shown as red lines and are labelled.

Supplementary Figure 4 – page 1

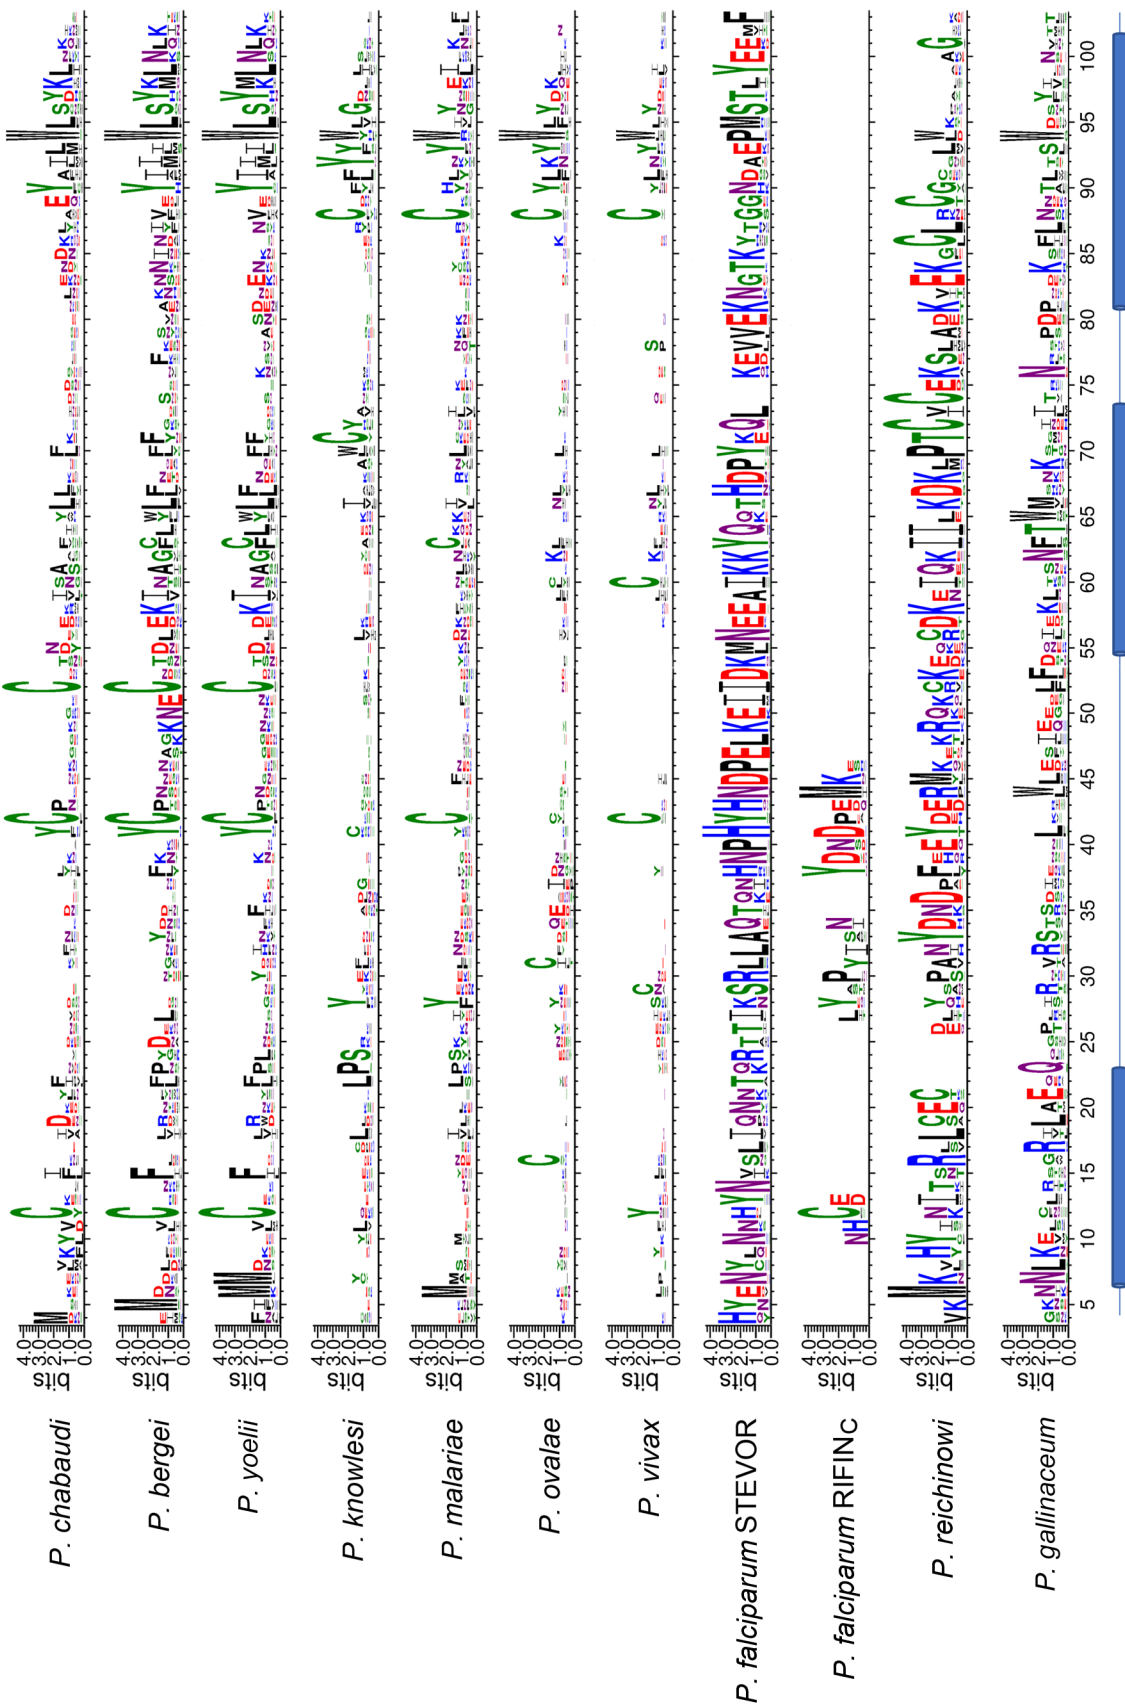

Supplementary Figure 4 – page 2

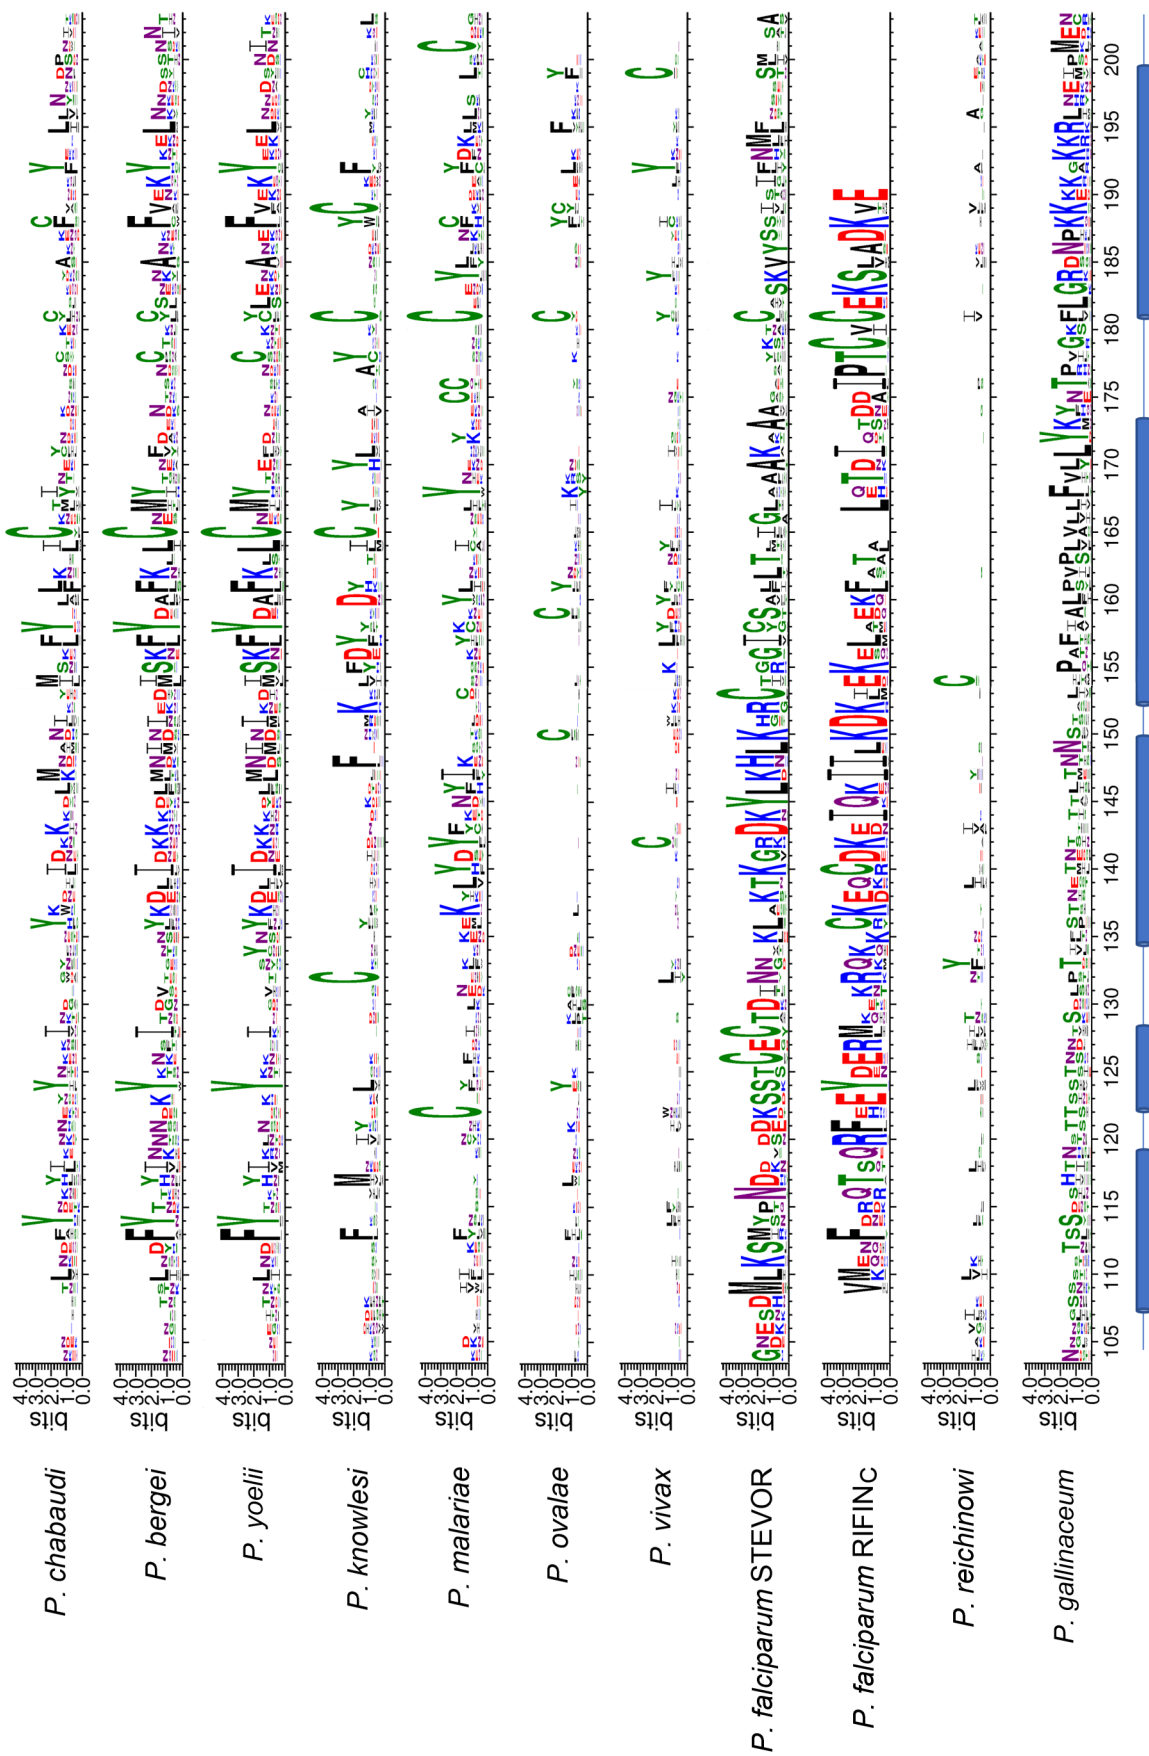

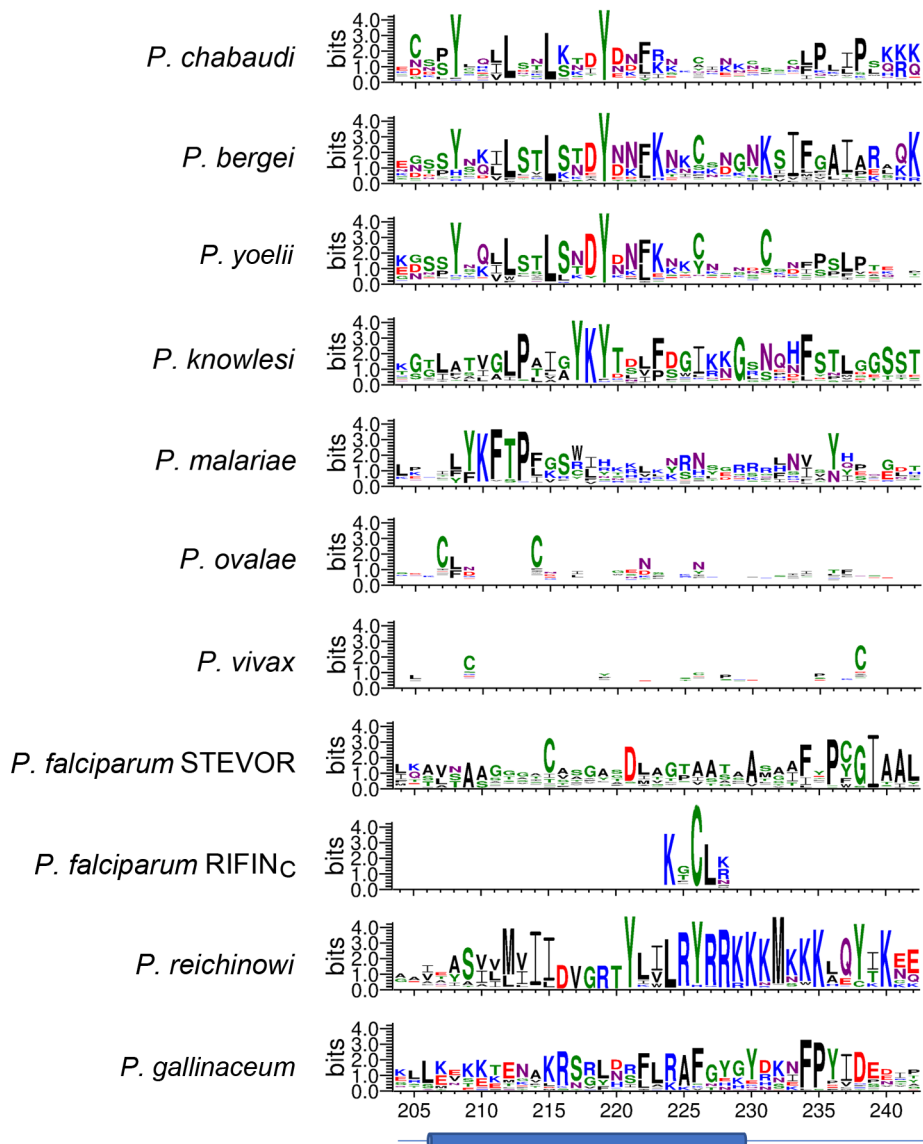

**Supplementary Figure 4: conservation and diversity across the small VSAs**

Sequences for small VSAs were aligned against the structure of PCHAS\_1200500 and a sequence logo was generated, numbered according to PCHAS\_1200500. The secondary structure of CIR PCHAS\_1200500 is shown underneath the LOGO, with helices as cylinders and elements without secondary structure shown as a blue line. The sequences used were from *Plasmodium chabaudi* (198 sequences from the AS v3 genome assembly (29)), *Plasmodium berghei* (135 sequences from the ANKA genome assembly (25)), *Plasmodium yoelii* (1011 sequences from the 17X v3 genome assembly (41)), *Plasmodium knowlesi* (70 sequences from the strain H genome assembly (42)), *Plasmodium malariae* (136 sequences from the UG01 genome assembly (43)), *Plasmodium ovale curtisi* (1495 sequences from the GH01 genome assembly (43)), *Plasmodium vivax* (1086 sequences from the *Plasmodium vivax* P01 (8)), *Plasmodium falciparum* (185 RIFIN sequences and 31 STEVOR sequences from the 3D7 genome assembly (44)), *Plasmodium reichinowi* 487 sequences from the G01 genome assembly (45), *Plasmodium gallinaceum* (20 sequences from the 8A assembly).

**Table S1: Table of crystallographic statistics**

---

| <b>Native collection statistics</b>          |                                               |
|----------------------------------------------|-----------------------------------------------|
| Space group                                  | P2 <sub>1</sub> 2 <sub>1</sub> 2 <sub>1</sub> |
| Cell dimensions                              |                                               |
| a, b, c (Å)                                  | 60.20, 63.58, 199.27                          |
| α, β, γ (°)                                  | 90, 90, 90                                    |
| Wavelength                                   | 0.97166 Å                                     |
| Resolution (Å)                               | 49.84 – 2.15 (2.22 – 2.15)                    |
| Total Observations                           | 79795 (6894)                                  |
| Total Unique                                 | 42523 (3621)                                  |
| R <sub>pim</sub> (%)                         | 4.0 (63.2)                                    |
| CC <sub>1/2</sub>                            | 1.00 (0.55)                                   |
| I/σ(I)                                       | 4.8 (1.3)                                     |
| Completeness (%)                             | 99.8 (99.9)                                   |
| Multiplicity                                 | 1.9 (1.9)                                     |
| Wilson B factor                              | 54.4                                          |
| <br><b>Sulphur-SAD Collection Statistics</b> |                                               |
| Space group                                  | P2 <sub>1</sub> 2 <sub>1</sub> 2 <sub>1</sub> |
| Cell dimensions                              |                                               |
| a, b, c (Å)                                  | 63.81, 65.61, 201.95                          |
| α, β, γ (°)                                  | 90, 90, 90                                    |
| Wavelength                                   | 2.755200                                      |
| Resolution (Å)                               | 62.41 – 3.00 (3.20-3.00)                      |
| Total Observations                           | 387923 (57599)                                |
| Total Unique                                 | 31506 (5127)                                  |
| R <sub>pim</sub> (%)                         | 6.2 (114.3)                                   |
| CC <sub>1/2</sub>                            | 1.00 (0.74)                                   |
| I/σ(I)                                       | 22.51 (1.82)                                  |
| Completeness (%)                             | 96.0 (88.9)                                   |
| Multiplicity                                 | 12.3 (11.2)                                   |
| CC <sub>anom</sub>                           | 0.62 (0.02)                                   |
| Anomalous Signal ( F(+)-F(-) /σ)             | 1.54 (0.70)                                   |
| <br><b>Refinement Statistics</b>             |                                               |
| Reflections                                  | 42587                                         |
| R <sub>work</sub> / R <sub>free</sub> (%)    | 21.2/23.6                                     |
| Average B factor                             | 64.0                                          |
| Number of residues                           | 700                                           |
| R.m.s deviations                             |                                               |
| Bond lengths (Å)                             | 0.008                                         |
| Bond angles (°)                              | 0.93                                          |
| Ramachandran plot                            |                                               |
| Favored (%)                                  | 96.2                                          |
| Allowed (%)                                  | 3.8                                           |
| Outliers (%)                                 | 0.0                                           |

---
